# Supplementary material for: Effects of company and season on blood fluke (Cardicola spp.) infection in ranched Southern Bluefin Tuna: preliminary evidence infection has a negative effect on fish growth
Source: PeerJ. 2023 Jul 25;11:e15763. doi: 10.7717/peerj.15763 (PMC10377432; doi:10.7717/peerj.15763)
Supplement: Supplemental Information 7 — All blood fluke information relating to each individual fish sampled (company and year specified). [file peerj-11-15763-s007.xlsx]

## Sheet: SBT harvest data
Company	Year	weight gg (kg)	length (cm)	CI	heart flush	eggs/mm	Cfor PCR heart	Cfor PCR gill	Cori PCR gill
A	2018				3	0.48	1950472	2762621	0
A	2018				2	0.57	1414243	12757402	0
A	2018				8	1.71	7237993	7907319	3229086
A	2018				10		7376458
A	2018				1	0.51	7164755	5950536	0
A	2018				1	0.14	1023583	694065	0
A	2018				1	1.3	4798137	8040995	0
A	2018				5	2.15	13775307	13907574	0
A	2018				1	1.35	5307426	11526492	0
A	2018				2	1.87	879543	4068806	0
A	2018				8	3.16	16232904	60207946	0
A	2018				4	1.98	3275532	12211146	0
A	2018				5	1.41	3921479	5405192	0
A	2018				5	1.76	2917634	3359468	0
A	2018				0	0.16	2094688	2043637	0
A	2019				0	0	0	0	0
A	2019				1	0.02	832881	0	0
A	2019	24.2	103	25.46	0	0	0	0	0
A	2019	31.3	113	24.93	3	0.53	272778	2079485	0
A	2019	20	98	24.42	0	0.06	0	0	0
A	2019	26.2	108	23.91	1	0.24	93140	0	0
A	2019				1	0.12	0	0	0
A	2019	21.5	99	25.47	1	0.14	107038	0	0
A	2019	20.8	96	27.02	6	0.15	153340	0	0
A	2019				2	0.04		0	0
A	2019	24	104	24.52	2	0.07		3133212	0
A	2019				4	0.02		0	0
A	2019	22.5	101	25.1	0	0.13		0	0
A	2019				0	0.11		0	0
A	2019				1	0.05		0	0
A	2021	23.2	105	23.04	0	0.7	2436862	0	0
A	2021	18.4	98	22.47	0	0	112804	0	0
A	2021	22.3	103	23.46	0	0.28	610411	0	0
A	2021	24.2	105	24.03	0	0	460471	0	0
A	2021	19.9	100	22.87	0	0.11	0	0	0
A	2021	22.8	102	24.7	0	0	0	0	0
A	2021	22.2	103	23.35	0	0.79	443968	870905	0
A	2021	21.9	101	24.43	0	0.15	0	0	0
A	2021	23	103	24.19	0	0	2474155	264152	0
A	2021	22.2	103	23.35	0	0.1	2134155	0	0
A	2021	29.1	110	25.13	0	0.16		0	0
A	2021	23.9	101	26.66	0	0	0	0	0
B	2018	23	98	28.09	0	0.41	202147	442366	0
B	2018	24	103	25.25	0	0.05	0	23158	0
B	2018	17.2	93	24.58	0	2.51	243901	1751593	0
B	2018	22.3	100	25.63	0	0.43	0	0	0
B	2018	24	103	25.25	0	0.07	0	414935	0
B	2018				1	0.03	0	0	0
B	2018	23.3	103	24.51	0	0	0	0	0
B	2018	20.6	97	25.94	0	0.51	54799	1083897	0
B	2018				1	0.09	0	985405	2334151
B	2018				0	0.51	104385	2757443	0
B	2018	37.3	120	24.81	0	0	0	1640910	0
B	2018	27.5	106	26.54	0	0.06	0	0	0
B	2018	21.9	97	27.58	0	0	0	134751	0
B	2018	26	102	28.16	4	0.5	186718	2592094	0
B	2018				1	0.02	0	1014798	0
B	2019	21.75	97	27.39		0.18		0	0
B	2019	42.2	126	24.25	0	0	0	0	0
B	2019	27.75	106	26.78	0	0.75	0	0	0
B	2019	21.5	100	24.71	0	0.04	0	0	0
B	2019	28.4	110	24.53	0	0	0	0	0
B	2019	26.6	104	27.18	1	0.02	9762	0	0
B	2019	18.2	92	26.87	2	0.09	28125	0	0
B	2019	16.9	94	23.39	0	0.24	0	148742	0
B	2019	24.75	108	22.58	1	0.08	66899	2715	0
B	2019	24.05	102	26.05	0	0.06	0	0	0
B	2019	22.95	102	24.86	0	0.08	0	0	0
B	2019	23.9	101	26.66	2	0	98114	130987	0
B	2019	28.2	113	22.46	0	0.24	0	0	0
B	2019	43.1	130	22.55	0	0	0	0	0
B	2019	24.35	104	24.88	0	0.11	0	0	0
B	2021	21.8	100	25.06	2	1.43	119218	3006520	0
B	2021	28.2	109	25.03	1	0	0	768299	0
B	2021	23.4	103	24.61	0	0.78	0	0	0
B	2021	25.6	106	24.71	0	0.3	4020255	1953654	0
B	2021	24.3	104	24.83	1	1.22	642912	4714954	0
B	2021	21.2	98	25.89	0	0	690429	0	0
B	2021	35.5	118	24.83	1	0	21118	0	0
B	2021	28.1	107	26.37	1	0.07	265726	0	0
B	2021	24.1	106	23.26	0	0	0	537036	0
B	2021	21.4	102	23.18	1	0.07	280380	0	0
B	2021	21.2	102	22.96	2	0	0	0	0
B	2021	15.5	91	23.64	0	0.11	160427	4288008	0
B	2021	21.8	102	23.61	0	0.31	50671	1238521	0
B	2021	27.6	110	23.83	2	1.01	2332520	4613781	0
B	2021	26.6	112	21.76	0	0.09	190066	0	0
C	2018	33.4	118	23.37	1	0.15	49348	248682	0
C	2018	26.2	109	23.25	0	0.01	0	0	0
C	2018	29.5	110	25.48	2	0.08	0	0	0
C	2018	24.2	108	22.08	1	0.02	74236	451386	0
C	2018	27.2	110	23.49	0	1	0	0	0
C	2018	27.2	110	23.49	0	0	37629	0	0
C	2018	16.2	92	23.91	1	0	0	0	0
C	2018	22.8	103	23.98		0.05		199138	0
C	2018	22.5	103	23.67	1	0.45	44674	0	0
C	2018	20.4	101	22.76	0	0.25	44522	248268	0
C	2018	27	110	23.32	1	0.04	0	102915	0
C	2018	27.2	109	24.14	0	0.33	34796	0	0
C	2018	29.6	111	24.88	0	0.08	81723	1568422	0
C	2018	26.6	109	23.61	0	0.38	27724	929280	0
C	2018	23.5	102	25.45	0	0.04	17930	439569	0
C	2019	24	104	24.52	0	2.13	3695052	102688	0
C	2019	22.6	102	24.48	0	0	0	0	0
C	2019	28.5	107	26.74	0	0.85	0	0	0
C	2019	20.2	100	23.22	0	0.04	0	205715	0
C	2019	28.4	109	25.21	1	0.05	524397	0	0
C	2019	22.8	100	26.21	1	0	1680307	0	0
C	2019	18	96	23.39	0	0.04	0	0	0
C	2019	26.6	106	25.67	0	0.05	0	1610102	0
C	2019	18.5	97	23.3	0	1.74	128246	269856	0
C	2019	18.5	93	26.44	0	0	32805	0	0
C	2019	27.5	105	27.31	0	0.14	183583	0	0
C	2019	25	106	24.13	0	0.26	336721	375527	0
C	2019	17.5	93	25.01		0.44		49601	0
C	2019	21.5	97	27.08	0	0.81	272805	318274	0
C	2019	23.8	105	23.63	0	0		0	0
C	2021	20.9	101	23.32	0	0	0	0	0
C	2021	22.5	100	25.86	1	0	0	0	0
C	2021	12	83	24.12	0	0	0	0	0
C	2021	26.6	109	23.61	0	0.08	0	0	0
C	2021	20.9	100	24.02	0	0.07	0	0	0
C	2021	19.2	99	22.74	0	0.13	43145	6414463	0
C	2021	21.6	102	23.4	0	0	0	0	0
C	2021	27.7	110	23.92	0	0.42	0	0	0
C	2021	20.2	101	22.54	0	0	0	0	0
C	2021	21.3	102	23.07	1	0	0	0	0
C	2021	17.4	95	23.33	0	0.19	17097	3624680	0
C	2021	28.6	112	23.4	0	2.39	990541	1387338	0
C	2021	16.5	97	20.78	0	0.2	12617	0	0
C	2021	13.9	90	21.92	0	0	0	0	0
C	2021	22.9	104	23.4	0	0.09	51675	0	0
D	2018	21.6	100	24.83	2	2.17	180509	2186492	0
D	2018	28	114	21.72	1	0.49	129755	1251925	0
D	2018	25	107	23.46	1	0.94	10407	5640594	0
D	2018	31	116	22.83	1	0.52	123154	3001460	0
D	2018	34.2	116	25.18	4	2.49	17547	1103047	0
D	2018	26.6	112	21.76	0	0.16	19401	2684551	0
D	2018	29	102	31.41	1	0.31	102404	3055334	0
D	2018	31.5	114	24.44	0	1.74	3010725	4983437	0
D	2018	25.8	108	23.54	0	0.1	0	3992393	0
D	2018	29.1	117	20.88	0	0.07	0	0	0
D	2018	21.6	100	24.83	0	0.24	728832	475362	0
D	2018	31.5	115	23.81	0	2.58	201199	5009769	0
D	2018	27	114	20.95	0	1.4	262056	6737217	0
D	2018	27	113	21.51	2	0.94	1507987	567421	0
D	2018	28.5	116	20.99	1	0.85	156236	868270	0
D	2019	30.8	114.5	23.58	0	0.34	175993	59381	10715128
D	2019	27.8	108	25.37	0	0.15	0	1372	0
D	2019	26.3	110	22.71	0	0	0	0	0
D	2019	24	105	23.83	0	0.09	32638	16636	0
D	2019	24.4	102	26.43	0	0.49	501759	20330	0
D	2019	45.7	128	25.05	1	0	28753	285869	0
D	2019	20	98	24.42	1	0.1	0	0	0
D	2019	23.8	100	27.36	0	0	0	0	0
D	2019	31.9	114	24.75	0	0.2	0	0	0
D	2019	36.3	118	25.39	1	0.08	1217287	11865	0
D	2019	19.2	95	25.74	0	0.6	2599295	279037	0
D	2019	32.1	113	25.57	0	0	18448	0	0
D	2019	26.7	107	25.05	0	2.53	4917576	2425291	0
D	2019	24.9	107	23.36	0	0.29	2119929	51836	0
D	2019	25.4	104	25.95	0	0.11	109776	2935	0
D	2021	26.4	106	25.48	0	0.64	174462	14490141	0
D	2021	25	102	27.08	0	0.08	0	0	0
D	2021	22	99	26.06	0	0.39	22109	6518577	0
D	2021	37.8	122	23.93	0	0.09	0	0	0
D	2021	29.1	112	23.81	0	0.2	0	0	0
D	2021	24.5	105	24.33	0	0.52	716037	4644784	0
D	2021	24.8	106	23.93	0	0	0	0	0
D	2021	23.5	104	24.01	0	0.56	195064	1195128	0
D	2021	24.5	105	24.33	0	0	0	0	0
D	2021	40	124	24.11	0	0.1	0	0	0
D	2021	33.5	114	25.99	0	0.09	0	0	0
D	2021	29.8	109	26.45	0	0	0	0	0
D	2021	26	105	25.82	2		157772
D	2021	34.5	116	25.41	0	0.04	14185	0	0
D	2021	26.2	104	26.77	0	0	0	0	0
E	2018	31.8	113	25.33	0	0.58	55901	2415554	0
E	2018	32.5	115	24.56		0.66		1901824	0
E	2018	22	100	25.29	0	0.37	23376	181481	0
E	2018	35	118	24.49	6	1.5	85208	2411459	0
E	2018	29.1	110	25.13	0	0.25	18249	439859	0
E	2018	22.8	103	23.98	2	3.94	846720	5825296	0
E	2018	30.5	111	25.63	0	0.37	0	1324978	0
E	2018	30.3	110	26.17	1	0.05	5073	554249	0
E	2018	32.8	114	25.45	0	0.14	0	0	0
E	2018	28.8	110	24.87	1	0.45	11311	132421	0
E	2018	24.1	104	24.63	5	0.36	62822	980388	0
E	2018	25	104	25.55	0	0.06	8741	0	0
E	2018	33.4	116	24.6	0	0.71	4258	290356	0
E	2018	24.1	104	24.63	2	0.34	7129	211814	0
E	2018	22.7	102	24.59	4	0.19	20766	0	0
E	2019	26.2	106	25.29	0	0	0	10968	0
E	2019	24	104	24.52	0	0	0	106492	0
E	2019	20.9	100	24.02	0	0.12	0	226988	0
E	2019	28.2	108	25.73	0	0.09	0	87517	0
E	2019	27.4	105	27.21	0	0.15	0	155246	0
E	2019	32.5	115	24.56	0	0	0	995	0
E	2019	24.2	99	28.67	2	0	0	0	0
E	2019	22.6	102	24.48	1	0	105476	275627	0
E	2019	23.7	105	23.53	0	0	0	0	0
E	2019	24.7	104	25.24	0	0	0	0	0
E	2019	29.5	109	26.18	0	0.1		177173	0
E	2019	28.6	109	25.38	0	0.24		36001	0
E	2019	35.2	117	25.26	0	0.08		52076	0
E	2019	23.3	101	25.99	0	0		100000	0
E	2019	23.5	103	24.72	2	0.03	118249	236752	0
E	2021	29.7	112	24.3	12	0.43	1053203	6854059	0
E	2021	27.5	110	23.75	4	0.19	148249	3089550	0
E	2021	23.3	101	25.99	1	0.88	110640	0	0
E	2021	25.1	108	22.9	0	0.01	138968	0	0
E	2021	27	109	23.96	0	0.17	76893	4358454	0
E	2021	24.4	104	24.93	1	0.81	0	0	0
E	2021	22.4	100	25.75		0.17		0	0
E	2021	23.4	104	23.91	0	0.21	0	0	0
E	2021	33.1	112	27.08	1	0.09	1814172	0	0
E	2021	33.5	117	24.04	0	0	40757	5281401	0
E	2021	27.1	109	24.05	1	0.09	114644	1460370	0
E	2021	25.1	108	22.9	2	0.06	403793	0	0
E	2021	35.2	117	25.26	1	0.06	0	0	0
E	2021	27.3	111	22.94		0.65		813371	0
E	2021	23.1	102	25.02	1	0.14	22697	494862	0
F	2018	24.8	107	23.27	0	0	0	0	0
F	2018	24.5	105	24.33	0	1.72	78649	0	0
F	2018	25	105	24.82	0	0.03	0	0	0
F	2018	29.5	113	23.5	2	0.62	250769	86153	0
F	2018	24.1	106	23.26	2	0.01	21314	0	0
F	2018	23	106	22.2	1	0.04	62202	0	0
F	2018	28.6	109	25.38	0	0	0	0	0
F	2018	22.7	105	22.54	0	0.02	0	0	0
F	2018	23.2	104	23.71	0	0.17	0	290049	0
F	2018	24.1	107	22.61	1	0.15	38848	0	0
F	2018	20.1	97	25.31	1	0.12	3361	316816	0
F	2018	22.6	105	22.44	1	0.11	24123	446557	0
F	2018	22.1	100	25.4	1	0.06	3244	264800	0
F	2018	36.1	122	22.85	0	0	0	0	0
F	2018	28.5	107	26.74	0	0.41	110846	677109	0
F	2019	26.7	108	24.36
F	2019	38.3	122	24.24	2	0.03	0	0	0
F	2019	44.2	124	26.62	2	0.05	120478	330850	0
F	2019	28.7	111	24.12	0	0.25	0	240086	0
F	2019	34.8	121	22.55	1	0	231659	0	0
F	2019	46.9	128	25.71	1	0.63	541872	1156318	0
F	2019	40.3	123	24.89	0	0.24	0	91961	0
F	2019	32.2	116	23.67	0	0.1	0	2535944	0
F	2019	27.3	110	23.58	2	0.09	78122	1864374	0
F	2019	29.4	111	24.71	1	0	0	0	0
F	2019	46	129	24.63	0	0.11	0	1374990	0
F	2019	26.5	105	26.26	0	0.09	0	0	0
F	2019	27.1	108	24.73	0	0.15		380866	0
F	2019	22.7	103	23.88	0	0		0	0
F	2019	27.1	108	24.73	0	0.23		142440	0
F	2021	25.4	107	23.79	1	0.16	0	0	0
F	2021	25.7	105	25.52	2	0.34	233427	976362	0
F	2021	25.1	102	27.13	1	0.03	120503	0	0
F	2021	27.5	115	20.78	1	0	501217	0	0
F	2021	24.1	101	26.89	0	0.18	182539	3990199	0
F	2021	22.8	103	23.98	1	0	220538	0	0
F	2021	24.9	105	24.72	0	0.56	0	11857241	0
F	2021	14.8	87	25.83	4	0.6	1222044	1558417	0
F	2021	24.4	105	24.23	0	0.17	914322	5457021	0
F	2021	26.6	107	24.96	3	0.15	109912	0	0
F	2021	25.9	102	28.05	3	0.29	116893	465434	0
F	2021	19.3	96	25.07	1	0.14	756089	6667343	0
F	2021	29.55	111	24.84	0	0	0	0	0
F	2021	22.5	104	22.99	2	0.09	547463	158398	0
F	2021	27.7	107	25.99	0	0.17	21761	2923374	0
G	2018				0	0.02	531360	0	0
G	2018				1	0.11	378005	1220414	0
G	2018				1	0.09	0	0	0
G	2018				2	0.07	272612	303525	0
G	2018				0	0.02	0	0	0
G	2018				1		298251
G	2018				0	0.34	142048	0	0
G	2018				3	0.15	645656	1449174	0
G	2018				0	0	0	0	0
G	2018				0	0	30990	16623	0
G	2018				0	0.04	0	135401	0
G	2018				0	0.1	28922	354331	0
G	2018				0	0.05	177919	14424	0
G	2018				0	0.45	87193	1592864	0
G	2018				1		0
G	2019	30.4	112	24.87	9	4.66	4162848	7201372	0
G	2019	36	120	23.95	1	0.47	356711	0	0
G	2019	35.3	121	22.9	8	1.46	3637656	4331138	119591
G	2019	32.1	115	24.26	8	3.98	21106656	5669343	89664
G	2019	27.3	107	25.61	1	0.26	101233	1850339	0
G	2019	19.2	97	24.18	0	0.44	257624	4131050	0
G	2019	31	113	24.69	2	1.93	3492625	1900518	0
G	2019	28	113	22.31	0	0.1	0	0	0
G	2019	23.5	106	22.68	8	0.16	3803411	13110100	0
G	2019	22.5	105	22.34	0	0.12	0	1215735	0
G	2019	25	105	24.82	1	0.39	221862	1182268	0
G	2019	27.1	111	22.78	0	0.17	332490	811708	0
G	2019	39.1	116	28.79	6	0.66	2153882	2574834	0
G	2019	22	103	23.14	2	0.13	19880	3157701	0
G	2019	27.1	110	23.4	6	0.45	1877929	2989408	0
G	2021	21	104	21.46	0	0.41	15000	230706	0
G	2021	20	104	20.44	0	0.26	1224466	3518148	0
G	2021	20.5	106	19.78	2	0.36	305367	10272951	0
G	2021	21	110	18.14	0	0	9823	0	0
G	2021	19	105	18.87	0	0	732325	0	0
G	2021	24	108	21.9	1	0.44	39885	16536207	0
G	2021	17	100	19.54	0	0.03	189071	1465921	0
G	2021	20.5	106	19.78	0	0.19	0	2318279	0
G	2021	21	103	22.09	0	0.5	15709	0	0
G	2021	22	106	21.23	0	0.18	45156	0	0
G	2021	27	114	20.95	1	0	128359	0	0
G	2021	18.5	104	18.9	0	0.35	0	874883	0
G	2021	22	106	21.23	0	0	1594938	0	0
G	2021	21.5	107	20.17	0	0.67	113327	2458428	0
G	2021	24.5	111	20.59	1	0.22	25249	0	0
